# Supplementary material for: Multicellularity and the Need for Communication—A Systematic Overview on (Algal) Plasmodesmata and Other Types of Symplasmic Cell Connections
Source: Plants (Basel). 2023 Sep 21;12(18):3342. doi: 10.3390/plants12183342 (PMC10536634; doi:10.3390/plants12183342)
Supplement: Supplementary file 1 [file plants-12-03342-s001.zip › Table_S1_Wegner_et_al.xlsx]

## Sheet: Overview_PD_in_Viridiplantae
								Strain						'-' explicit mention of no PD																					.
Phylum	Class	Order	Family	Genus	Species	Paper	Year	SAG	CCAP	UTEX	ATCC	CCALA	other	PD/PDLC	DT/ER/ inner structure	Cytokinesis	Comments
Chlorophyta	Chlorophyceae	Chaetopeltidales	Chaetopeltidaceae	Koshicola	spirodelophila	Watanabe et al.	2016						CONN 256414	-
Chlorophyta	Chlorophyceae	Chaetopeltidales	Chaetopeltidaceae	Pseudulvella	americana	Sanchez-Puerta et al.	2006			2852			freshly collected (Argentinia) -> deposited University of California (UC 1819306)	-
Chlorophyta	Chlorophyceae	Chaetopeltidales		*new genus	*new species	Sanchez-Puerta et al.	2003							-			only abstract book-> lack of detailed information -> species not named and no fitting description in algaebase found (isolator and place of isolation)
Chlorophyta	Chlorophyceae	Chaetophorales	Aphanochaetaceae	Aphanochaete	elegans	Stewart et al.	1973	67.90		1917			DDT-39	X	likely	- (Phycoplast Segaar & Lookhorst 1988)	Marchant in Gunning & Robards 1976: "My own studies have not revealed desmotubules in the plasmodesmata between old cells of Coleochaete or Aphanochaete."
Chlorophyta	Chlorophyceae	Chaetophorales	Aphanochaetaceae	Aphanochaete	magnum	Stewart et al.	1973	68.90		1909			DDT-3	X		-	Stewart and SAG: as magna instead of magnum
Chlorophyta	Chlorophyceae	Chaetophorales	Aphanochaetaceae	Aphanochaete	magnum	Segaar & Lokhorst	1988	68.90		1909			DDT-3	x		cell plate - phycoplast	in paper and SAG as A. magna, no UTEX number mentioned but should be this strain (right isolator)
Chlorophyta	Chlorophyceae	Chaetophorales	Barrancaceae	Barranca	variabilis	Egorova et al.	2023						collected from Siberian soil			furrow??	mention PD as characteristic for Chaetophorales in introduction but not in results or discussion despite TEM work -> only Chaetophorales familiy w/o described PD
Chlorophyta	Chlorophyceae	Chaetophorales	Chaetophoraceae	Caespitella	pascheri	Stewart et al.	1973						CCIU1571	X		-	in Stewart as Stigeoclonium pascheri
Chlorophyta	Chlorophyceae	Chaetophorales	Chaetophoraceae	Chaetophora	elegans	Michetti et al.	2003						freshly collected (Argentinia)	X			Las paredes transversales presentan numerosos plasmodesmos uniformemente distribuidos'; could potentially be Chaetophoropsis elegans
Chlorophyta	Chlorophyceae	Chaetophorales	Chaetophoraceae	Chaetophora	lobata	Stewart et al.	1973	413-1	413/1	1289				X		cell plate - phycoplast	in Stewart and SAG as Chaetophora incrassata (algaebase and CCAP say C. lobata)
Chlorophyta	Chlorophyceae	Chaetophorales	Chaetophoraceae	Draparnaldia	mutabilis	Stewart et al.	1973	418-1	418/1A	423				X		cell plate - phycoplast	in Stewart as Draparnaldia plumosa
Chlorophyta	Chlorophyceae	Chaetophorales	Chaetophoraceae	Gongrosira	papuasica	Stewart et al.	1973						DDT-5	-		-	directly provided by isolator (Tupa); Gongrosira fluminensis from the genus was recently renamed to Lithotrichon fluminense and reclassified to the Ulvales
Chlorophyta	Chlorophyceae	Chaetophorales	Chaetophoraceae	Gongrosira	papuasica	Chappell et al.	1978						DDT-5	-			Gongrosira fluminensis from the genus was recently renamed to Lithotrichon fluminense and reclassified to the Ulvales
Chlorophyta	Chlorophyceae	Chaetophorales	Chaetophoraceae	Leptosiropsis	torulosa	Sanchez-Puerta et al.	2003							-			only abstract book-> lack of detailed information -> in abstract classified in Chaetopeltidales but belongs to Chaetophorales based on algaebase.org
Chlorophyta	Chlorophyceae	Chaetophorales	Chaetophoraceae	Pleurococcus	sp.	Stewart et al.	1973						CCIU433	-		-	can not be identified and dependent on the species could have been reclassified in a variety of taxa (Chlamydomonadales, Trebouxiophyceae, Sphaeropleales, Rhodophyta?!, Cyanobacteria?!)
Chlorophyta	Chlorophyceae	Chaetophorales	Chaetophoraceae	Sporocladopsis	novae-zelandiae	Leonardi et al.	2002						freshly collected (Chile)	X		furrow!!!	only species were just furrowing is mentioned as division mechanism that possess PD, epiphyte for Phaeophyte
Chlorophyta	Chlorophyceae	Chaetophorales	Chaetophoraceae	Stigeoclonium	aestivale	Stewart et al.	1973			1573				X		-
Chlorophyta	Chlorophyceae	Chaetophorales	Chaetophoraceae	Stigeoclonium	aestivale	Michetti et al.	2010			2924			freshly collected (Argentinia)	X	no
Chlorophyta	Chlorophyceae	Chaetophorales	Chaetophoraceae	Stigeoclonium	farctum	Stewart et al.	1973			1575				X		cell plate - phycoplast
Chlorophyta	Chlorophyceae	Chaetophorales	Chaetophoraceae	Stigeoclonium	farctum	Michetti et al.	2010			2922			freshly collected (Argentinia)	X	no
Chlorophyta	Chlorophyceae	Chaetophorales	Chaetophoraceae	Stigeoclonium	helveticum	Floyd et al.	1971							X	central structure?	cell plate - phycoplast	Stigeoclonium helveticum var. maius Vischer
Chlorophyta	Chlorophyceae	Chaetophorales	Chaetophoraceae	Stigeoclonium	helveticum	Floyd et al.	1972	477-2	447/1	441				X		cell-plate (phycoplast?)	quote Floyd et al. 1971 (not found) for recently found presence PD, but do not mention Stigeoclonium explicitly like Ulothrix
Chlorophyta	Chlorophyceae	Chaetophorales	Chaetophoraceae	Stigeoclonium	helveticum	Stewart et al.	1973	477-2	447/1	441				X		cell plate - phycoplast
Chlorophyta	Chlorophyceae	Chaetophorales	Chaetophoraceae	Stigeoclonium	sp.	Dawes	1966							X			what they call PD does not look like PD (fixation/preparation not yet as sophisticated/artifacts??), looked at cell walls (TEM) of multiple algae (Stigeoclonium only one with with previously described PD); and unclear statement:'Under the light microscope, and with microchemical stains, the cell wall of the filamentous representatives of the Zygnematales (Spirogyra) and Ulothrichales (Stigeocloni…
Chlorophyta	Chlorophyceae	Chaetophorales	Chaetophoraceae	Stigeoclonium	subsecundum	Stewart et al.	1973			1574				X		-	in algaebase.org two var. no identified as Stigeoclonium tenue
Chlorophyta	Chlorophyceae	Chaetophorales	Chaetophoraceae	Stigeoclonium	tenue	Stewart et al.	1973						CCIU437	X		cell plate - phycoplast	based on algaebase.org different var. now identified as other Stigeoclonium species
Chlorophyta	Chlorophyceae	Chaetophorales	Chaetophoraceae	Stigeoclonium	tenue	Michetti et al.	2002						freshly collected (Argentinia)	X			akinete formation
Chlorophyta	Chlorophyceae	Chaetophorales	Chaetophoraceae	Stigeoclonium	tenue	Michetti et al.	2010			2921			freshly collected (Argentinia)	X	no
Chlorophyta	Chlorophyceae	Chaetophorales	Chaetophoraceae	Stigeoclonium	variabile	Stewart et al.	1973			1577				X		-
Chlorophyta	Chlorophyceae	Chaetophorales	Chaetophoraceae	Stigeoclonium	variabile	Michetti et al.	2010			2923			freshly collected (Argentinia)	X	no
Chlorophyta	Chlorophyceae	Chaetophorales	Fritschiellaceae	Fritschiella	sp.	Stewart et al.	1973			1334				X		cell plate	in Stewart referred to as Fritschiella tuberosa -> in algaebase.org only 2 Fritschiella species listed
Chlorophyta	Chlorophyceae	Chaetophorales	Fritschiellaceae	Fritschiella	tuberosa	McBride	1967	1.91	428/2	1821				?		cell plate (phragmoplast? mesoplast)	only one picture and do not mention PD -> but McBride 1970 cited by Stewart et al. 1973 und Marchant 1976 (in Gunnung & Robards) as proof for PD
Chlorophyta	Chlorophyceae	Chaetophorales	Schizomeridaceae	Schizomeris	leibleinii	Stewart et al.	1973	44.84		1228				X		cell plate - phycoplast
Chlorophyta	Chlorophyceae	Chaetophorales	Uronemataceae	Uronema	belkae	Stewart et al.	1973	34.86		1179				X		cell plate - phycoplast	in Stewart as Ulothrix belkae
Chlorophyta	Chlorophyceae	Chaetophorales	Uronemataceae	Uronema	confervicola	Stewart et al.	1973	386-2	386/2	331				X		cell plate - phycoplast	in Stewart as Uronema confervicolum
Chlorophyta	Chlorophyceae	Chaetophorales	Uronemataceae	Uronema	gigas	Stewart et al.	1973	368-2	386/3	174	30443			X		-	Algaebase (last update 2019) as Ulothix -> SAG, NCBI, Egorova et al. 2023 and Liu et al. 2020 as Uronema
Chlorophyta	Chlorophyceae	Chaetophorales	Uronemataceae	Uronema	sp.	Katsaros et al.	2011	335-1b	335/1B					X		cell plate - phycoplast	formed during cell division, in SAG as Klebsormidium nitens -> but they mention in paper that they found out it is a Uronema species
Chlorophyta	Chlorophyceae	Chlamydomonadales	Pleurastraceae	Pleurastrum	terricola	Stewart et al.	1973	463-2	463/2	333				-		-	in UTEX and Stewart Pleurastrum terrestre, SAG Leptosira terrestris -> algaebase.org Pleurastrum = currently accepted name for Leptosira
Chlorophyta	Chlorophyceae	Chlamydomonadales	Pleurastraceae	Pleurastrum	terricola	Molnar et al.	1975	463-2	463/2	333						furrow from one side (phycoplast/trochoplast microtuble apparatus)	UTEX and Molnar: Pleurastrum terrestre, SAG Leptosira terrestris -> algaebase.org Pleurastrum = currently accepted name for Leptosira
Chlorophyta	Chlorophyceae	Chlamydomonadales	Volvocaceae	Volvox	aureus	Deason et al.	1969			1899			M5	cytoplasmic bridges		furrow -> hybrid mode?	the cytoplasmic bridges should be considered as PDLC -> conclusions I (develop in cell plate, with or w/o ER)
Chlorophyta	Chlorophyceae	Chlamydomonadales	Volvocaceae	Volvox	tertius	Pickett-Heaps	1970	88-3	88/3B	132				large cytoplasmic connections (with ER)			'Cytoplasmic connections were large and numerous in young coenobia, but were generally absent in older vegetative colonies'; the cytoplasmic bridges should be considered as PDLC -> conclusions I (develop in cell plate, with or w/o ER)
Chlorophyta	Chlorophyceae	Oedogoniales	Oedogoniaceae	Bulbochaete	hiloensis	Fraser & Gunning	1969		555/2	954				X
Chlorophyta	Chlorophyceae	Oedogoniales	Oedogoniaceae	Bulbochaete	hiloensis	Retallack & Butler	1970		555/2	954				X			only stated that cultures are from UTEX, but not which strain number (954 only one available)
Chlorophyta	Chlorophyceae	Oedogoniales	Oedogoniaceae	Bulbochaete	hiloensis	Fraser & Gunning	1973		555/2	954				X		septum formation
Chlorophyta	Chlorophyceae	Oedogoniales	Oedogoniaceae	Bulbochaete	hiloensis	Pickett-Heaps	1973		555/2	954				X		like Oedogonium (wall ring) -> cell-plate formation with phycoplast
Chlorophyta	Chlorophyceae	Oedogoniales	Oedogoniaceae	Bulbochaete	hiloensis	Retallack & Butler	1973			954?				X			only stated that cultures are from UTEX, but not which strain number (954 only one available); PD in artheridial crosswall get plugged during spermatogenesis
Chlorophyta	Chlorophyceae	Oedogoniales	Oedogoniaceae	Oedogonium	borisianum	Hill & Machlis	1968							?		septum moved in divion plane	image explicitly said:' Arrows indicate possible plugs of material in wall, since no evidence for plasmodesmata has been found.', but it looks like a PD
Chlorophyta	Chlorophyceae	Oedogoniales	Oedogoniaceae	Oedogonium	cardiacum	Coss & Pickett-Heaps	1974	575-1a	575/1A	39							do not mention PD (TEM observations), both papers, Spermiogenese -> by Marchant 1976 (in Gunning & Robards) used to write about Oedogonium PD
Chlorophyta	Chlorophyceae	Oedogoniales	Oedogoniaceae	Oedogonium	macrandrium	D'Amico et al.	2013						freshly collected (Argentinia)	X			basal antheridial cell and vegetative cells -> later used for claims of no PD???
Chlorophyta	Chlorophyceae	Oedogoniales	Oedogoniaceae	Oedogonium	sp.	Pickett-Heaps & Fowke	1969						freshly collected (Australia)	X		Septum that moves in position of cell plate (see word file)	additionally Oedogonium cardiacum und O. foveolatum, do not mention PD but visible in micrographs
Chlorophyta	Chlorophyceae	Oedogoniales	Oedogoniaceae	Oedogonium	sp.	Pickett-Heaps	1971						collected in Australia	X		moveable septum	'at least 4 unidentified Oedogonium species (epiphytic on leaves)'; cited by Marchant 1976 in Gunning & Robards
Chlorophyta	Chlorophyceae	Sphaeropleales	Cylindrocapsaceae	Cylindrocapsa	geminella	Sluiman	1984						collected (Netherlands)			cell plate/septum by ER-derived vesicles (no phycoplast, but other microtubule structre?), no furrowing	pseudo filaments, do not mention PD
Chlorophyta	Chlorophyceae	Sphaeropleales	Cylindrocapsaceae	Cylindrocapsa	involuta	Stewart et al.	1973	314-1	314/1	653				-		-
Chlorophyta	Chlorophyceae	Sphaeropleales	Cylindrocapsaceae	Cylindrocapsa	involuta	Pickett-Heaps & McDonald	1975	314-1	314/1	653						furrow (asymmetrical) - no phycoplast (Golgi vesicles)	do not mention PD
Chlorophyta	Chlorophyceae	Sphaeropleales	Microsporaceae	Flintia	transversalis	Stewart et al.	1973	27.83		1252				-		furrow	in Stewart as Radiofilum transversale
Chlorophyta	Chlorophyceae	Sphaeropleales	Microsporaceae	Microspora	amoena	Pickett-Heaps	1973	348-1	348/1	472				-		invaginations of outer membrane + cell plate (phycoplast)	in Pickett-Heaps species not yet known (Microspora sp.)
Chlorophyta	Chlorophyceae	Sphaeropleales	Microsporaceae	Microspora	amoena	Stewart et al.	1973	348-1	348/1	472				-		furrow - phycoplast	in Stewart as Microspora sp.
Chlorophyta	Chlorophyta classis incertae sedis	Chlorophyta ordo incertae sedis	Chlorophyta incertae sedis	Smithsoniella	earleae	Brawley & Sears	1982							septal plugs		furrow	'No plasmodesmata traverse the cross-wall, and the septal plug blocks cytoplasmic continuity [… and] consists of an elctron-translucent core bordered at each end by two electron-opaque caps.'
Chlorophyta	Chlorophyta classis incertae sedis	Chlorophyta ordo incertae sedis	Chlorophyta incertae sedis	Smithsoniella	earleae	Sears & Brawley	1982						collected US virgin islands and cultered in Smithsonian Institution coral reef microcosm at the Museum of Natural History	septal plugs / pit connections		furrow
Chlorophyta	Trebouxiophyceae	Microthamniales	Microthamniaceae	Microthamnion	kuetzingianum	Stewart et al.	1973	450-1b	450/1B	318				-		furrow	SAG as Aphanochaete sp., NCBI Chlorella sp., CCAP like Stewart
Chlorophyta	Trebouxiophyceae	Prasiolales	Koliellaceae	Koliella	longiseta	Stewart et al.	1973	470-1	470/1A	339			Prague 165	-		furrow	in Stewart Raphidonema longiseta
Chlorophyta	Trebouxiophyceae	Prasiolales	Stichococcaceae	Deuterostichococcus	marinus	Stewart et al.	1973	2139		1706			CAUP J 1303	-		furrow	in Stewart as Klebsormidium marinum; SAG Deuterostichococcus deasonii
Chlorophyta	Trebouxiophyceae	Prasiolales	Stichococcaceae	Stichococcus	bacillaris	Stewart et al.	1973	379-1c	379/1C	419				-		-
Chlorophyta	Trebouxiophyceae	Prasiolales	Stichococcaceae	Stichococcus	bacillaris	Pickett-Heaps	1974	379-2		315						annular cleavage furrow, no phycoplast	do not mention PD, in paper as Stichococuus chloranthus, not found in UTEX , in SAG as Stichococcus bacillaris -> some var. inalgaebase as Tritostichococcus coniocybes -> image quality insufficent
Chlorophyta	Trebouxiophyceae	Prasiolales	Stichococcaceae	Stichococcus	bacillaris	Katsaros et al.	2011	379-1b	379/1B	314						Microtubule association with cytokinetic diaphragm	do not mention PD
Chlorophyta	Trebouxiophyceae	Prasiolales	Stichococcaceae	Stichococcus	bacillaris	Katsaros et al.	2011	379-2		315						Microtubule association with cytokinetic diaphragm	do not mention PD, in paper as Stichococuus chloranthus, not found in UTEX , in SAG as Stichococcus bacillaris -> some var. inalgaebase as Tritostichococcus coniocybes
Chlorophyta	Trebouxiophyceae	Trebouxiophyceae ordo incertae sedis	Trebouxiophyceae incertae sedis	Leptosira	obovata	Stewart et al.	1973	445-1	445/1	319				-		-
Chlorophyta	Trebouxiophyceae	Trebouxiophyceae ordo incertae sedis	Trebouxiophyceae incertae sedis	Leptosira	obovata	Molnar et al.	1975	445-1	445/1	319						furrow from one side (phycoplast/trochoplast microtuble apparatus)	Molnar: Pleurastrum obovatum; do not mention PD
Chlorophyta	Ulvophyceae	Bryopsidales	Codiaceae	Codium	bursa	Küster	1933						collected (Italy)	single cytoplasmic connections			siphonal species (fragmentation), connections called PD but difinitivly not the case (1.5 to 2 µm diameter), uncertainty with definitive identification of species
Chlorophyta	Ulvophyceae	Bryopsidales	Codiaceae	Codium	fragile	Küster	1933						collected (Germany)	single cytoplasmic connections			siphonal species (fragmentation), connections called PD but difinitivly not the case (1.5 to 2 µm diameter), uncertainty with definitive identification of species
Chlorophyta	Ulvophyceae	Bryopsidales	Codiaceae	Codium	tomentosum	Küster	1933						collected (Italy)	single cytoplasmic connections			siphonal species (fragmentation), connections called PD but difinitivly not the case (1.5 to 2 µm diameter), uncertainty with definitive identification of species
Chlorophyta	Ulvophyceae	Trentepohliales	Trentepohliaceae	Cephaleuros	parasiticus	Chapman & Henk	1986	73.90		2412				X		cell-plate (phragmoplast?)	microtubles […] appear to mark the sites of plasmodesmata formation, but no endoplasmatic reticulum is directly involved'
Chlorophyta	Ulvophyceae	Trentepohliales	Trentepohliaceae	Cephaleuros	sp.	Chappell et al.	1978		411/1					X			PD evenly distributed within wall, not in the CCAP catalogue anymore
Chlorophyta	Ulvophyceae	Trentepohliales	Trentepohliaceae	Cephaleuros	sp.	Chappell et al.	1978						freshly collected (Florida)	X			from 4 different hosts (Camellia, Jasminum, Magnolia, Persea) -> all with PD pits
Chlorophyta	Ulvophyceae	Trentepohliales	Trentepohliaceae	Cephaleuros	virescens	Chapman & Good	1978						freshly collected (Louisiana)	X	no		PD only in central pit, very low image quality, 40-50nm diameter no inner structure like Bulbochaete
Chlorophyta	Ulvophyceae	Trentepohliales	Trentepohliaceae	Phycopeltis	epiphyton	Chapman & Good	1978						freshly collected (Louisiana)	X			PD only in central pit, very low image quality, 40-50nm diameter
Chlorophyta	Ulvophyceae	Trentepohliales	Trentepohliaceae	Trentepohlia	afra	Rindi et al.	2006						collected in South Africa	X		phragmoplast-like	collected in Tanzania, South Africa and Namibia -> specimen deposited in the Phycological Herbarium Galway (GALW)
Chlorophyta	Ulvophyceae	Trentepohliales	Trentepohliaceae	Trentepohlia	annulata	Rindi & López-Bautista	2008						collected in French Guyana	X		phragmoplast-like	Again only light microscopy really PD or larger pores???, for other trentepohliales species no PD mentioned
Chlorophyta	Ulvophyceae	Trentepohliales	Trentepohliaceae	Trentepohlia	aurea	Stewart et al.	1973	483-1	483/1	429		511		X		-
Chlorophyta	Ulvophyceae	Trentepohliales	Trentepohliaceae	Trentepohlia	bosseae	Rindi et al.	2005						collected in Hawaii	X		phragmoplast-like	Again only light microscopy really PD or larger pores???, for other trentepohliales species no PD mentioned, in paper named Printzina bosseae
Chlorophyta	Ulvophyceae	Trentepohliales	Trentepohliaceae	Trentepohlia	bosseae	Rindi & López-Bautista	2008						collected in French Guyana	X		phragmoplast-like	Again only light microscopy really PD or larger pores (central pits with PD typical for Trentepohliales see Chappell 1978)???, for other trentepohliales Species no PD mentioned, in paper named Printzina bosseae
Chlorophyta	Ulvophyceae	Trentepohliales	Trentepohliaceae	Trentepohlia	bosseae	Rindi et al.	2008						collected in Panama	X		phragmoplast-like	Again only light microscopy really PD or larger pores???, for other trentepohliales species no PD mentioned, in paper named Printzina bosseae
Chlorophyta	Ulvophyceae	Trentepohliales	Trentepohliaceae	Trentepohlia	chinensis	Rindi et al.	2006						collected in Tanzania and South Africa	X		phragmoplast-like	'Plasmodesmata between adjacent cells were often very obvious.'
Chlorophyta	Ulvophyceae	Trentepohliales	Trentepohliaceae	Trentepohlia	diffracta	Rindi & López-Bautista	2007						collected in French Guyana	X		phragmoplast-like	Again only light microscopy really PD or larger pores???, for other trentepohliales species no PD mentioned
Chlorophyta	Ulvophyceae	Trentepohliales	Trentepohliaceae	Trentepohlia	diffracta	Rindi & López-Bautista	2008						collected in French Guyana	X		phragmoplast-like	Again only light microscopy really PD or larger pores???, for other trentepohliales species no PD mentioned
Chlorophyta	Ulvophyceae	Trentepohliales	Trentepohliaceae	Trentepohlia	odorata	Chapman et al.	2001		483/4					X		phragmoplast, centripetally growing cell-plate	'Plasmodesmata were found only in the thinner central portion of the cross-wall. Although less dramatic, a similar situation was observed in the cross-walls of vegetative cells in more mature thalli.'
Chlorophyta	Ulvophyceae	Trentepohliales	Trentepohliaceae	Trentepohlia	sp.	Stewart et al.	1973			1227				X		cell plate
Chlorophyta	Ulvophyceae	Trentepohliales	Trentepohliaceae	Trentepohlia	sp.	Chapman & Good	1978						freshly collected (Louisiana)	X		phragmoplast-like	PD only in central pit, very low image quality, 40-50nm diameter
Chlorophyta	Ulvophyceae	Trentepohliales	Trentepohliaceae	Trentepohlia	sp.	Chappell et al.	1978			1227				X		phragmoplast-like
Chlorophyta	Ulvophyceae	Trentepohliales	Trentepohliaceae	Trentepohlia	sp.	Rindi et al.	2008						collected in Panama	X		phragmoplast-like	Again only light microscopy really PD or larger pores???, for other trentepohliales Species no PD mentioned
Chlorophyta	Ulvophyceae	Ulotrichales	Helicodictyaceae	Rhexinema	paucicellulare	Stewart et al.	1973	463-1	463/1	332		411		-		-	in Stewart, CCAP und UTEX still called Pleurastrum paucicellulare
Chlorophyta	Ulvophyceae	Ulotrichales	Sarcinofilaceae	Sarcinofilum	mucosum	Stewart et al.	1973	24.93		1335				-		furrow	in Stewart as Trichosarcina polymorpha
Chlorophyta	Ulvophyceae	Ulotrichales	Sarcinofilaceae	Sarcinofilum	mucosum	Mattox & Stewart	1974	24.93		1335						furrow	do not mention PD, in Mattox as Trichosarcina polymorpha
Chlorophyta	Ulvophyceae	Ulotrichales	Tupiellaceae	Vischerioclonium	submersum	Stewart et al.	1973			1913			DDT-25	-		-	in UTEX und Stewart as Pseudendoclonium basiliense (var. brandii)
Chlorophyta	Ulvophyceae	Ulotrichales	Tupiellaceae	Vischerioclonium	submersum	Mattox & Stewart	1974			1913			DDT-25			furrow	do not mention PD, UTEX und Mattox as Pseudendoclonium basiliense (var. brandii)
Chlorophyta	Ulvophyceae	Ulotrichales	Ulotrichaceae	Ulothrix	albicans	Lokhorst & Star	1980						from freshwater culteres at the Rijksherbarium				no PD mention
Chlorophyta	Ulvophyceae	Ulotrichales	Ulotrichaceae	Ulothrix	fimbriata	Floyd et al.	1971							X	central structure?	cell plate - phycoplast	Ulothrix fimbriata Bold -> likely belongs to Uronemaphyceae (see SI Fig.3)
Chlorophyta	Ulvophyceae	Ulotrichales	Ulotrichaceae	Ulothrix	fimbriata	Floyd et al.	1972	36.86	384/2	638				X		cell-plate (phycoplast?)	quote Floyd et al. 1971 for PD found; with pictures no clear identification possible; Ulothrix fimbriata Bold -> likely belongs to Uronemaphyceae (see SI Fig.3)
Chlorophyta	Ulvophyceae	Ulotrichales	Ulotrichaceae	Ulothrix	fimbriata	Stewart et al.	1973	36.86	384/2	638				X		cell plate - phycoplast	Ulothrix fimbriata Bold -> likely belongs to Uronemaphyceae (see SI Fig.3)
Chlorophyta	Ulvophyceae	Ulotrichales	Ulotrichaceae	Ulothrix	flacca	Lokhorst	1978						collected of Dutch, French and Norwegian Coast			furrow	no PD mention
Chlorophyta	Ulvophyceae	Ulotrichales	Ulotrichaceae	Ulothrix	implexa	Lokhorst	1978						collected of Dutch, French and Norwegian Coast	-		furrow	no PD mentioned in Lokhorst & Star 1980
Chlorophyta	Ulvophyceae	Ulotrichales	Ulotrichaceae	Ulothrix	mucosa	Lokhorst & Star	1980						from freshwater culteres at the Rijksherbarium				no PD mention
Chlorophyta	Ulvophyceae	Ulotrichales	Ulotrichaceae	Ulothrix	palusalsa	Lokhorst	1978						collected of Dutch, French and Norwegian Coast	-		furrow
Chlorophyta	Ulvophyceae	Ulotrichales	Ulotrichaceae	Ulothrix	speciosa	Lokhorst	1978						collected of Dutch, French and Norwegian Coast			furrow	no PD mention
Chlorophyta	Ulvophyceae	Ulotrichales	Ulotrichaceae	Ulothrix	subflaccida	Lokhorst	1978						collected of Dutch, French and Norwegian Coast				no PD mention
Chlorophyta	Ulvophyceae	Ulotrichales	Ulotrichaceae	Ulothrix	tenerrima	Lokhorst & Star	1980						from freshwater culteres at the Rijksherbarium				no PD mention
Chlorophyta	Ulvophyceae	Ulotrichales	Ulotrichaceae	Ulothrix	tenuissima	Lokhorst & Star	1980						from freshwater culteres at the Rijksherbarium				no PD mention
Chlorophyta	Ulvophyceae	Ulotrichales	Ulotrichaceae	Ulothrix	tenuissima	Sluiman et al.	1983						from Rijksherbarium (Leiden) now part of 'Naturalis Biodiversity Center'			early furrow than stop and formation of new septum from vesicles without involvement of a phycoplast	do not mention PD
Chlorophyta	Ulvophyceae	Ulotrichales	Ulotrichaceae	Ulothrix	zonata	Stewart et al.	1973			745				-		furrow
Chlorophyta	Ulvophyceae	Ulotrichales	Ulotrichaceae	Ulothrix	zonata	Lokhorst & Star	1980						from freshwater culteres at the Rijksherbarium				no PD mention
Chlorophyta	Ulvophyceae	Ulotrichales	Ulotrichaceae	Ulothrix	zonata	Sluiman et al.	1983						from Rijksherbarium (Leiden) now part of 'Naturalis Biodiversity Center'			early furrow than stop and formation of new septum from vesicles without involvement of a phycoplast	do not mention PD
Chlorophyta	Ulvophyceae	Ulvales	Ctenocladaceae	Ctenocladus	circinnatus	Stewart et al.	1973			769				-		-
Chlorophyta	Ulvophyceae	Ulvales	Ctenocladaceae	Ctenocladus	circinnatus	Chappell et al.	1978			769				single central plug/pit			Blinn & Morrison (1974) reported the presence of a single central plug or pit-like cytoplasmic continuity in Ctenocladus circinnatus Borzi and our observations confirm their report (Fig. 6).'
Chlorophyta	Ulvophyceae	Ulvales	Ctenocladaceae	Ctenocladus	circinnatus	Arino et al.	1996						collected from arcaeological sites in Spain	single pit-like connection
Chlorophyta	Ulvophyceae	Ulvales	Kornmanniaceae	Lithotrichon	fluminense	Liu et al.	2019						FACHB-2334	-			taxonomic transfer -> previously Gongrosira fluminensis (Chaetophorales) (-> based on DNA evidence (rDNA & plastidome) and plasmodesmata + pyrenoid characteristics)
Chlorophyta	Ulvophyceae	Ulvales	Ulvaceae	Percursaria	percursa	Stewart et al.	1973			1423				-		-
Chlorophyta	Ulvophyceae	Ulvales	Ulvaceae	Ulva	compressa	Løvlie & Bråten	1968						mutant 'Slender' (Foyn 1959)			furrow	do not mention PD despite extensive TEM work, in paper as Ulva mutabilis
Chlorophyta	Ulvophyceae	Ulvales	Ulvaceae	Ulva	compressa	Løvlie & Bråten	1970						mutant 'Slender' (Foyn 1959)			furrow	do not mention PD despite extensive TEM work
Chlorophyta	Ulvophyceae	Ulvales	Ulvaceae	Ulva	intertinalis	McArthur & Moss	1977						collected in England			furrow	do not mention PD despite extensive TEM work, in paper as Enteromorpha intertinalis
Chlorophyta	Ulvophyceae	Ulvales	Ulvaceae	Ulva	intertinalis	McArthur & Moss	1978						collected in England			furrow	do not mention PD despite extensive TEM work, in paper as Enteromorpha intertinalis
Chlorophyta	Ulvophyceae	Ulvales	Ulvaceae	Ulva	lactuca	Stewart et al.	1973		1318/1	1428				-		furrow	in algaebase.org and CCAP/WoRMS var. latissima as Saccharina latissima (Phaeophyceae, Laminariales), but all other still belong to Ulvales
Chlorophyta	Ulvophyceae	Ulvales	Ulvaceae	Ulva	pilifera	Messyasz et al.	2013						collected in Poland	-			in paper as Ulva flexuosa subsp. pilifera
Chlorophyta	Ulvophyceae	Ulvales	Ulvaceae	Ulva	pilifera	Messyasz et al.	2013						collected in Poland	-			in paper as Ulva flexuosa subsp. pilifera
Chlorophyta	Ulvophyceae	Ulvales	Ulvellaceae	Ulvella	ramosa	Leonardi et al.	1997						collected in Chile	-			in paper as Endophyton ramosum (Ulvales), now Endophyton part of chaetophorales
Streptophyta	Charaphyceae	Charales	Characeae	Chara	braunii	Franceschi et al.	1994							X		cell plate - phragmoplast	'Additional observations were also made on Chara braunii, and Nitella translucens [...] Complete developmental studies will be conducted on these and other algal species (to be published else where), but preliminary results indicate that the mechanism of secondary plasmodesmal formation is essentially the same as described for Chara corallina (data not shown).'
Streptophyta	Charaphyceae	Charales	Characeae	Chara	corallina	Fischer et al.	1974						provided by Spanswick	X		cell plate - phragmoplast	cell wall between internodal and peripheral + central cell
Streptophyta	Charaphyceae	Charales	Characeae	Chara	corallina	Franceschi & Lucas	1982							X		cell plate - phragmoplast	could also be Chara australis
Streptophyta	Charaphyceae	Charales	Characeae	Chara	corallina	Franceschi et al.	1994							X		cell plate - phragmoplast	almost or all PD formed secondarily, no ER/DT, microtubuli?
Streptophyta	Charaphyceae	Charales	Characeae	Chara	corallina	Faulkner et al.	2009						collected in Australia	X		cell plate - phragmoplast
Streptophyta	Charaphyceae	Charales	Characeae	Chara	fibrosa	Pickett-Heaps	1968							X	ER frequently passes through PD	cell plate - phragmoplast	antheridia, ER frequently passes through PD
Streptophyta	Charaphyceae	Charales	Characeae	Chara	sp.	Pickett-Heaps	1967						provided by Mr. R. R. Willing, Department of Botany, Australian National University	X	some central structure	cell plate - phragmoplast	very numerous, generelly seem to contain some central structure
Streptophyta	Charaphyceae	Charales	Characeae	Chara	sp.	Pickett-Heaps	1967						provided by Mr. R. R. Willing, Department of Botany, Australian National University	X	not directly connected to ER	cell plate - phragmoplast	PD formed early by incomplete fusion of cell plate; PD in older wall various substructures, but not directly connected to ER
Streptophyta	Charaphyceae	Charales	Characeae	Chara	tomentosa	Kwiatkowska	2003							X		cell plate - phragmoplast
Streptophyta	Charaphyceae	Charales	Characeae	Chara	tomentosa	Kwiatkowska et al.	2003						collected from polish lake	X	temporal ER penetration into PD	cell plate - phragmoplast	Antheridia; temporal ER penetration into PD
Streptophyta	Charaphyceae	Charales	Characeae	Chara	vulgaris	Kwiatkowska & Maszewski	1986							X		cell plate - phragmoplast	Antheridia; plugging and unplugging of PD; complex PD
Streptophyta	Charaphyceae	Charales	Characeae	Chara	vulgaris	Kwiatkowska	2003							X		cell plate - phragmoplast
Streptophyta	Charaphyceae	Charales	Characeae	Chara	vulgaris	Kwiatkowska et al.	1985							X		cell plate - phragmoplast	PD plugging and opening
Streptophyta	Charaphyceae	Charales	Characeae	Chara	zeylanica	Cook et al.	1997						collected from soil water tank	X		cell plate - phragmoplast	inner structure (even spoke like structures?); primary formation including ER entrappment?
Streptophyta	Charaphyceae	Charales	Characeae	Chara	zeylanica	Cook et al.	1998						collected from soil water tank	X		cell plate - phragmoplast	branched/complex PD
Streptophyta	Charaphyceae	Charales	Characeae	Nitella	axilliformis	Kikuyama et al.	1992							X		cell plate - phragmoplast	molecules up to 45 kDa pass through Nitella PD
Streptophyta	Charaphyceae	Charales	Characeae	Nitella	translucens	Spanswick & Costerton	1967							X		cell plate - phragmoplast
Streptophyta	Charaphyceae	Charales	Characeae	Nitella	translucens	Franceschi et al.	1994							X		cell plate - phragmoplast	'Additional observations were also made on Chara braunii, and Nitella translucens [...] Complete developmental studies will be conducted on these and other algal species (to be published else where), but preliminary results indicate that the mechanism of secondary plasmodesmal formation is essentially the same as described for Chara corallina (data not shown).'
Streptophyta	Chlorokybophyceae	Chlorokybales	Chlorokybaceae	Chlorokybus	riethii	Lokhorst et al.	1988	48.80	403/1	2591				-		furrow	in paper as C. atmophyticus, 'involvement of coated vesicles in the furrowing process, and occurrence of transversely aligned cleavage microtubules.'
Streptophyta	Coleochaetophyceae	Coleochaetales	Coleochaetaceae	Coleochaete	nitellarum	Stewart et al.	1973	3.91		1261				X		-
Streptophyta	Coleochaetophyceae	Coleochaetales	Coleochaetaceae	Coleochaete	orbicularis	Cook	2004									Phragmoplast	do not mention PD
Streptophyta	Coleochaetophyceae	Coleochaetales	Coleochaetaceae	Coleochaete	orbicularis	Graham	1982						collected from pond (Michigan)	X		Phragmoplast(?)	PD in radial and circumferential walls, but not between radial non-sister cells, 'advanced discoid'
Streptophyta	Coleochaetophyceae	Coleochaetales	Coleochaetaceae	Coleochaete	irregularis	Graham	1982						collected from lake (Wisconsin)	X		Phragmoplast(?)	PD only shown in sketch, 'primitive branched filamentous'
Streptophyta	Coleochaetophyceae	Coleochaetales	Coleochaetaceae	Coleochaete	soluta	Graham	1982						collected from lake (Wisconsin)	X		Phragmoplast(?)	PD in radial and circumferential walls, 'transitional between […] C. irregularis [and] C. orbicularisa and C. scutata'
Streptophyta	Coleochaetophyceae	Coleochaetales	Coleochaetaceae	Coleochaete	scutata	Graham	1982						collected from pond (Michigan)	X		Phragmoplast(?)	PD only shown in sketch, 'advanced discoid'
Streptophyta	Coleochaetophyceae	Coleochaetales	Coleochaetaceae	Coleochaete	scutata	Marchant & Pickett-Heaps	1973			610				X		cell plate - phragmoplast (small furrow ingrowth and annulary growth in contrast to land plants?)
Streptophyta	Coleochaetophyceae	Coleochaetales	Coleochaetaceae	Coleochaete	scutata	Stewart et al.	1973			610				X		cell plate - phragmoplast
Streptophyta	Coleochaetophyceae	Coleochaetales	Coleochaetaceae	Coleochaete	scutata	Marchant	1977			610				X		cell plate - phragmoplast (small furrow ingrowth and annulary growth in contrast to land plants?)
Streptophyta	Coleochaetophyceae	Coleochaetales	Coleochaetaceae	Coleochaete	scutata	Marchant	1977	110.80	414/1					X		cell plate - phragmoplast (small furrow ingrowth and annulary growth in contrast to land plants?)
Streptophyta	Klebsormidiophyceae	Klebsormidiales	Klebsormidiaceae	Interfilum	massjukiae	Mikhailyuk et al.	2008	2102					ACKU 418-06				do not mention PD, according algaebase.org belongs to Ulotrichales, But last updated in 2010 and Rindi et al. 2011 (and SAG) classified as sister to Klebsormidium
Streptophyta	Klebsormidiophyceae	Klebsormidiales	Klebsormidiaceae	Interfilum	massjukiae	Mikhailyuk et al.	2014	2102					ACKU 418-06				do not mention PD, according algaebase.org belongs to Ulotrichales, But last updated in 2010 and Rindi et al. 2011 (and SAG) classified as sister to Klebsormidium
Streptophyta	Klebsormidiophyceae	Klebsormidiales	Klebsormidiaceae	Interfilum	paradoxum	Mikhailyuk et al.	2008	338-1	338/1	177	30445		IAM C-161				do not mention PD, according algaebase.org belongs to Ulotrichales, But last updated in 2010 and Rindi et al. 2011 (and SAG) classified as sister to Klebsormidium
Streptophyta	Klebsormidiophyceae	Klebsormidiales	Klebsormidiaceae	Interfilum	paradoxum	Mikhailyuk et al.	2014	338-1	338/1	177	30445		IAM C-161				do not mention PD, according algaebase.org belongs to Ulotrichales, But last updated in 2010 and Rindi et al. 2011 (and SAG) classified as sister to Klebsormidium
Streptophyta	Klebsormidiophyceae	Klebsormidiales	Klebsormidiaceae	Interfilum	sp.	Mikhailyuk et al.	2008	2101					ACKU 289-04				do not mention PD, according algaebase.org belongs to Ulotrichales, But last updated in 2010 and Rindi et al. 2011 (and SAG) classified as sister to Klebsormidium
Streptophyta	Klebsormidiophyceae	Klebsormidiales	Klebsormidiaceae	Interfilum	sp.	Mikhailyuk et al.	2008	2147					CAUP J 203				do not mention PD, according algaebase.org belongs to Ulotrichales, But last updated in 2010 and Rindi et al. 2011 (and SAG) classified as sister to Klebsormidium
Streptophyta	Klebsormidiophyceae	Klebsormidiales	Klebsormidiaceae	Interfilum	sp.	Mikhailyuk et al.	2014	2101					ACKU 289-04				do not mention PD, according algaebase.org belongs to Ulotrichales, But last updated in 2010 and Rindi et al. 2011 (and SAG) classified as sister to Klebsormidium
Streptophyta	Klebsormidiophyceae	Klebsormidiales	Klebsormidiaceae	Interfilum	terricola	Mikhailyuk et al.	2008	2100					ACKU 57-02				do not mention PD, according algaebase.org belongs to Ulotrichales, But last updated in 2010 and Rindi et al. 2011 (and SAG) classified as sister to Klebsormidium
Streptophyta	Klebsormidiophyceae	Klebsormidiales	Klebsormidiaceae	Interfilum	terricola	Mikhailyuk et al.	2014	2100					ACKU 57-02				do not mention PD, according algaebase.org belongs to Ulotrichales, But last updated in 2010 and Rindi et al. 2011 (and SAG) classified as sister to Klebsormidium
Streptophyta	Klebsormidiophyceae	Klebsormidiales	Klebsormidiaceae	Klebsormidium	crenulatum	Lokhorst & Star	1980						from freshwater culteres at the Rijksherbarium				no PD mention, in paper as Ulothrix crenulata (Kützing)
Streptophyta	Klebsormidiophyceae	Klebsormidiales	Klebsormidiaceae	Klebsormidium	crenulatum	Mikhailyuk et al.	2014	2415						-			Klebsormidium: walls lack PD
Streptophyta	Klebsormidiophyceae	Klebsormidiales	Klebsormidiaceae	Klebsormidium	dissectum	Mikhailyuk et al.	2014	2417						-			Klebsormidium: walls lack PD
Streptophyta	Klebsormidiophyceae	Klebsormidiales	Klebsormidiaceae	Klebsormidium	dissectum	Mikhailyuk et al.	2014	2416						-			Klebsormidium: walls lack PD
Streptophyta	Klebsormidiophyceae	Klebsormidiales	Klebsormidiaceae	Klebsormidium	elegans	Mikhailyuk et al.	2014						PIT1	-			in Paper as K. cf. bilatum; Klebsormidium: walls lack PD
Streptophyta	Klebsormidiophyceae	Klebsormidiales	Klebsormidiaceae	Klebsormidium	elegans	Mikhailyuk et al.	2014	5.96					KL 44	-			Klebsormidium: walls lack PD
Streptophyta	Klebsormidiophyceae	Klebsormidiales	Klebsormidiaceae	Klebsormidium	flaccidum	Stewart et al.	1973			2017			f41	-		furrow w/o tubules
Streptophyta	Klebsormidiophyceae	Klebsormidiales	Klebsormidiaceae	Klebsormidium	flaccidum	Katsaros et al.	2011	335-2a	335/2A	322						furrow	do not mention PD, SAG as K. nitens
Streptophyta	Klebsormidiophyceae	Klebsormidiales	Klebsormidiaceae	Klebsormidium	flaccidum	Mikhailyuk et al.	2014						KUE1	-			Klebsormidium: walls lack PD
Streptophyta	Klebsormidiophyceae	Klebsormidiales	Klebsormidiaceae	Klebsormidium	flaccidum	Mikhailyuk et al.	2014						ASIB V100	-			Klebsormidium: walls lack PD
Streptophyta	Klebsormidiophyceae	Klebsormidiales	Klebsormidiaceae	Klebsormidium	fluitans	Mikhailyuk et al.	2014						BOT3	-			Klebsormidium: walls lack PD
Streptophyta	Klebsormidiophyceae	Klebsormidiales	Klebsormidiaceae	Klebsormidium	mucosum	Lokhorst & Star	1980						from freshwater culteres at the Rijksherbarium			furrow	no PD mention, in paper as Ulothrix verrucosa (Lokhorst)
Streptophyta	Klebsormidiophyceae	Klebsormidiales	Klebsormidiaceae	Klebsormidium	mucosum	Lokhorst & Star	1985						collected in Netherlands	-		furrow
Streptophyta	Klebsormidiophyceae	Klebsormidiales	Klebsormidiaceae	Klebsormidium	nitens	Mikhailyuk et al.	2014						STR1	-			Klebsormidium: walls lack PD
Streptophyta	Klebsormidiophyceae	Klebsormidiales	Klebsormidiaceae	Klebsormidium	sp.	Floyd et al.	1971							-		furrow	in Paper as Hormidium, now belongs to Klebsormidium (algaebase.org)
Streptophyta	Klebsormidiophyceae	Klebsormidiales	Klebsormidiaceae	Klebsormidium	sp.	Mikhailyuk et al.	2014						14613.5e	-			Klebsormidium: walls lack PD
Streptophyta	Klebsormidiophyceae	Klebsormidiales	Klebsormidiaceae	Klebsormidium	sterile	Stewart et al.	1973						CCIU 978	-		-
Streptophyta	Klebsormidiophyceae	Klebsormidiales	Klebsormidiaceae	Klebsormidium	subtile	Stewart et al.	1973	384-1	384/1	462				-		-	in Stewart as Klebsormidium subtilissimum
Streptophyta	Klebsormidiophyceae	Klebsormidiales	Klebsormidiaceae	Klebsormidium	subtile	Lokhorst & Star	1980						from freshwater culteres at the Rijksherbarium				no PD mention, in Paper as Ulothrix subtilis (Kützing), likely now Klebsormidium but not certain; in introduction lack of PD in Ulothrix implexa mentioned
Streptophyta	Klebsormidiophyceae	Klebsormidiales	Klebsormidiaceae	Klebsormidium	subtile	Katsaros et al.	2011	384-1	384/1	462						furrow	do not mention PD, in paper as K. subtilissimum
Streptophyta	Zygnematophyceae	Spirogyrales	Spirogyraceae	Spirogyra	sp.	Fowke & Pickett-Heaps	1969						no information			special phragmoplast and furrowing combination (check Sawitzky & Grolig 1995)	do not mention PD, Marchant 1976 in Gunning and Robards cited this paper to proclaim no PD in Spirogyra
Streptophyta	Zygnematophyceae	Zygnematales	Zygnemataceae	Mougeotia	disjuncta	Permann et al.	2021						collected in Austria			furrow + cell plate (phragmoplast)	sexual reproduction, do not mention PD (TEM)
Streptophyta	Zygnematophyceae	Zygnematales	Zygnemataceae	Mougeotia	parvula	Permann et al.	2021						collected in Austria			furrow + cell plate (phragmoplast)	sexual reproduction, do not mention PD (TEM)
Streptophyta	Zygnematophyceae	Zygnematales	Zygnemataceae	Mougeotia	sp.	Pickett-Heaps & Wetherbee	1987			supposedly deposited, but only Mougeotia strain not isolated in Australia			collected in Australia			furrow + cell plate (phragmoplast)	do not mention PD (TEM)
Streptophyta	Zygnematophyceae	Zygnematales	Zygnemataceae	Zygnema	sp.	Kaplan et al.	2013					976	collected arctis	-
Streptophyta	Zygnematophyceae	Zygnematales	Zygnemataceae	Zygnema	sp.	Kaplan et al.	2013					977	collected arctica	-
Streptophyta	Zygnematophyceae	Zygnematales	Zygnemataceae	Zygnema	sp.	Kaplan et al.	2013						CCCryo 278-06, collected antarctica	-
from publications we could not access:
Chlorophyta	Chlorophyceae	Chaetophorales	Chaetophoraceae	Draparnaldia	glomerata	Lokhorst et al.	1984							X			from google scholar preview:"… middle lamella pierced by plasmodesmata which show a …", might actually be Draparnaldia mutabilis
Chlorophyta	Chlorophyceae	Chaetopeltidales	Chaetopeltidaceae	Oncosaccus	(tetrasporoides)	Liu et al.	2021							-			from google scholar preview:"Oncosaccus tetrasporoides resembled Chaetopeltis and Pseudulvella, and adjacent cells lacked plasmodesmata"; species not specified, but O. tetrasporoides only described species
Chlorophyta	Ulvophyceae	Ulotrichales	Ulotrichaceae	Ulothrix	palusalsa	Segaar & Lokhorst	1987										do not mention PD, Lokhorst 1978 already explicitly stated the lack of PD
Chlorophyta	Ulvophyceae	Ulotrichales	Ulotrichaceae	Ulothrix	mucosa	Lokhorst	1986										do not mention PD, also looked at in Lokhorst & Star 1980
Chlorophyta	Ulvophyceae	Ulvales	Ctenocladaceae	Ctenocladus	circinnatus	Blinn & Morrison	1974							pit-like intercellular cytoplasmic connections			cited in Raven 1997
Chlorophyta	Chlorophyceae	Chaetophorales	Schizomeridaceae	Schizomeris	leibleinii	Mattox et al.	1974							X			Abstract:"In Schizomeris cytokinesis is by cell plate formation with associated phycoplast microtubules, and plasmodesmata are present in the transverse walls."
Chlorophyta	Trebouxiophyceae	Prasiolales	Prasiolaceae	Prasiola	crispa	Jacob et al.	1992							(-)			from google scholar preview:"… responses of the antarctic green alga Prasiola crispa ssp.antarctica(… The fine structural organization of Prasiola crispa cells under … The cells did not contain vacuoles or plasmodesmata. …"

## Sheet: corresponding Literature
Arino, X.; Hernández Mariné, M.; Saiz-Jimenez, C. Ctenocladus circinnatus (Chlorophyta) in stuccos from archaeological sites of southern Spain. Phycologia 1996, 35, 183-189, doi:10.2216/i0031-8884-35-3-183.1.
Blinn, D.W.; Morrison, E. Intercellular cytoplasmic connections in Ctenocladus circinnatus Borzi (Chlorophyceae) with possible ecological significance. Phycologia 1974, 13, 95-97, doi:10.2216/i0031-8884-13-2-95.1.
Brawley, S.H.; Sears, J.R. Septal Plugs in a Green Alga. American Journal of Botany 1982, 69, 455-463, doi:10.2307/2443151.
Chapman, R.L.; Borkhsenious, O.; Brown, R.C.; Henk, M.C.; Waters, D.A. Phragmoplast-mediated cytokinesis in Trentepohlia: results of TEM and immunofluorescence cytochemistry. International Journal of Systematic and Evolutionary Microbiology 2001, 51, 759-765, doi:https://doi.org/10.1099/00207713-51-3-759.
Chapman, R.L.; Good, B.H. Ultrastructure of plasmodesmata and cross walls in Cephaleuros, Phycopeltis and Trentepohlia (Chroolepidaceae; Chlorophyta). British Phycological Journal 1978, 13, 241-246, doi:10.1080/00071617800650291.
Chapman, R.L.; Henk, M.C. PHRAGMOPLASTS IN CYTOKINESIS OF CEPHALEUROS PARASITICUS (CHLOROPHYTA) VEGETATIVE CELLS 1. Journal of Phycology 1986, 22, 83-88, doi:https://doi.org/10.1111/j.1529-8817.1986.tb02519.x.
Chappell, D.F.; Stewart, K.D.; Mattox, K.R. On Pits and Plasmodesmata of Trentepohlialean Algae (Chlorophyta). Transactions of the American Microscopical Society 1978, 97, 88-94.
Cook, M.; Graham, L.; Botha, C.; Lavin, C. Comparative ultrastructure of plasmodesmata of Chara and selected bryophytes: toward an elucidation of the evolutionary origin of plant plasmodesmata. Am J Bot 1997, 84, 1169.
Cook, M.E. Cytokinesis in Coleochaete orbicularis (Charophyceae): An Ancestral Mechanism Inherited by Plants. American Journal of Botany 2004, 91, 313-320.
Cook, M.E.; Graham, L.E.; Lavin, C.A. Cytokinesis and nodal anatomy in the charophycean green alga Chara zeylanica. Protoplasma 1998, 203, 65-74, doi:10.1007/BF01280588.
Coss, R.A.; Pickett-Heaps, J.D. Gametogenesis in the green alga Oedogonium cardiacum. Protoplasma 1974, 81, 297-311, doi:10.1007/BF01275817.
D’AMICO, S.-L.; LEONARDI, P.-I.; CÁCERES, E.-J. Ultrastructure of multicellular dwarf males with external gametangium in Oedogonium macrandrium (Oedogoniales, Chlorophyta). BIOCELL 2013, 37, 85--90.
Dawes, C.J. A light and electron microscope survey of algal cell walls. II, Chlorophyceae. 1966.
Deason, T.R.; Darden, W.H.; Ely, S. The development of sperm packets of the M5 strain of Volvox aureus. Journal of Ultrastructure Research 1969, 26, 85-94, doi:https://doi.org/10.1016/S0022-5320(69)90037-9.
Egorova, I.N.; Kulakova, N.V.; Boldina, O.N.; Tupikova, G.S. Barranca variabilis sp. nov. - A New Terrestrial Alga of the Genus Barranca (Chaetophorales, Chlorophyta) from the Baikal Region (Russia). Diversity 2023, 15, 583.
Faulkner, C.R.; Blackman, L.M.; Collings, D.A.; Cordwell, S.J.; Overall, R.L. Anti-tropomyosin antibodies co-localise with actin microfilaments and label plasmodesmata. European Journal of Cell Biology 2009, 88, 357-369, doi:https://doi.org/10.1016/j.ejcb.2009.02.184.
Fischer, R.; Dainty, J.; Tyree, M. A quantitative investigation of symplasmic transport in Chara corallina. I. Ultrastructure of the nodal complex cell walls. Canadian Journal of Botany 1974, 52, 1209-1214.
Floyd, G.L.; Stewart, K.D.; Mattox, K.R. COMPARATIVE CYTOLOGY OF ULOTHRIX AND STIGEOCLONIUM1. Journal of Phycology 1972, 8, 68-81, doi:https://doi.org/10.1111/j.1529-8817.1972.tb04004.x.
Floyd, G.L.; Stewart, K.D.; Mattox, K.R. Cytokinesis and plasmodesmata in Ulothrix. Journal of Phycology 1971, 7, 306-309, doi:https://doi.org/10.1111/j.1529-8817.1971.tb01523.x.
Fowke, L.C.; Pickett-Heaps, J.D. CELL DIVISION IN SPIROGYRA. II. CYTOKINESIS. Journal of Phycology 1969, 5, 273-281, doi:https://doi.org/10.1111/j.1529-8817.1969.tb02614.x.
Franceschi, V.R.; Ding, B.; Lucas, W.J. Mechanism of plasmodesmata formation in characean algae in relation to evolution of intercellular communication in higher plants. Planta 1994, 192, 347-358.
Franceschi, V.R.; Lucas, W.J. The relationship of the charasome to chloride uptake in Chara corallina: physiological and histochemical investigations. Planta 1982, 154, 525-537.
Fraser, T.W.; Gunning, B.E.S. The ultrastructure of plasmodesmata in the filamentous green alga, Bulbochaete hiloensis (Nordst.) tiffany. Planta 1969, 88, 244-254, doi:10.1007/BF00385067.
Fraser, T.W.; Gunning, B.E.S. Ultrastructure of the Hairs of the Filamentous Green Alga Bulbochaete hiloensis (Nordst.) Tiffany: an Apoplastidic Plant Cell with a Well Developed Golgi Apparatus. Planta 1973, 113, 1-19.
Graham, L.E. THE OCCURRENCE, EVOLUTION, AND PHYLOGENETIC SIGNIFICANCE OF PARENCHYMA IN COLEOCHAETE BRÉB. (CHLOROPHYTA). American Journal of Botany 1982, 69, 447-454, doi:https://doi.org/10.1002/j.1537-2197.1982.tb13278.x.
Hill, G.J.C.; Machlis, L. AN ULTRASTRUCTURAL STUDY OF VEGETATIVE CELL DIVISION IN OEDOGONIUM BORISIANUM12. Journal of Phycology 1968, 4, 261-271, doi:https://doi.org/10.1111/j.1529-8817.1968.tb04694.x.
Jacob, A.; Wiencke, C.; Lehmann, H.; Kirst, G.O. Physiology and Ultrastructure of Desiccation in the Green Alga Prasiola crispa from Antarctica. 1992, 35, 297-304, doi:doi:10.1515/botm.1992.35.4.297.
Kaplan, F.; Lewis, L.A.; Herburger, K.; Holzinger, A. Osmotic stress in Arctic and Antarctic strains of the green alga Zygnema (Zygnematales, Streptophyta): effects on photosynthesis and ultrastructure. Micron 2013, 44, 317-330, doi:10.1016/j.micron.2012.08.004.
Katsaros, C.I.; Varvarigos, V.; Gachon, C.M.M.; Brand, J.; Motomura, T.; Nagasato, C.; Küpper, F.C. Comparative Immunofluorescence and Ultrastructural Analysis of Microtubule Organization in Uronema sp., Klebsormidium flaccidum, K. subtilissimum, Stichococcus bacillaris and S. chloranthus (Chlorophyta). Protist 2011, 162, 315-331, doi:https://doi.org/10.1016/j.protis.2010.10.004.
Kikuyama, M.; Hara, Y.; Shimada, K.; Yamamoto, K.; Hiramoto, Y. Intercellular transport of macromolecules in Nitella. Plant and cell physiology 1992, 33, 413-417.
Küster, E. Die Plasmodesmen von Codium. Protoplasma 1933, 19, 335-349, doi:10.1007/BF01606232.
Kwiatkowska, M. Plasmodesmal changes are related to different developmental stages of antheridia of Chara species. Protoplasma 2003, 222, 1-11, doi:10.1007/s00709-003-0001-y.
Kwiatkowska, M.; Maszewski, J. Changes in the occurrence and ultrastructure of plasmodesmata in antheridia ofChara vulgaris L. during different stages of spermatogenesis. Protoplasma 1986, 132, 179-188, doi:10.1007/BF01276998.
Kwiatkowska, M.; Maszewski, J. Changes in ultrastructure of plasmodesmata during spermatogenesis in Chara vulgaris L. Planta 1985, 166, 46-50, doi:10.1007/BF00397384.
Kwiatkowska, M.; Popłońska, K.; Wojtczak, A. Chara tomentosa Antheridial Plasmodesmata at Various Stages of Spermatogenesis. Biologia Plantarum 2003, 46, 233-238, doi:10.1023/A:1022802711225.
Leonardi, P.I.; Cáceres, E.J.; Correa, J.A. Ultrastructure and Taxonomy of Sporocladopsis novae-zelandiae (Ulvophyceae, Chlorophyta). 2002, 45, 324-330, doi:doi:10.1515/BOT.2002.032.
Leonardi, P.I.; Correa, J.A.; Cáceres, E.J. Ultrastructure and taxonomy of the genus Endophyton (Ulvales, Ulvophyceae). European Journal of Phycology 1997, 32, 175-183, doi:10.1080/09670269710001737109.
Liu, B.; Wang, Q.; Li, S.; Fang, J.; Liu, G.; Hu, Z. Taxonomic transfer of Gongrosira fluminensis Fritsch (Chaetophorales, Chlorophyceae) to Lithotrichon Darienko et Pröschold (Ulvales, Ulvophyceae) based on morphological observation and phylogenetic analyses. Fottea 2019, 19, 25-32, doi:10.5507/fot.2018.014.
Liu, B.; Zhu, H.; Zhao, Z.; Xiong, Q.; Liu, G.; Hu, Z. Oncosaccus: a rare green alga endemic to China belongs to Chaetopeltidales (Chlorophyceae, Chlorophyta). Phycologia 2021, 60, 2-9, doi:10.1080/00318884.2020.1816042.
Lokhorst, G.M. Taxonomic studies on the marine and brackish-water species of Ulothrix (Ulotricales, Chlorophyceae) in western Europe. Blumea: Biodiversity, Evolution and Biogeography of Plants 1978, 24, 191-299.
Lokhorst, G.M. The ultrastructure of Ulothrix mucosa. I. Mitosis and cytokinesis. Canadian Journal of Botany 1986, 64, 156-165, doi:10.1139/b86-024.
Lokhorst, G.M.; Bakker, M.E.; Star, W. Ultrastructure of Draparnaldia glomerata (Chaetophorales, Chlorophyceae) II. Mitosis and cytokinesis. Nordic Journal of Botany 1984, 4, 553-562, doi:https://doi.org/10.1111/j.1756-1051.1984.tb02063.x.
Lokhorst, G.M.; Sluiman, H.J.; Star, W. THE ULTRASTRUCTURE OF MITOSIS AND CYTOKINESIS IN THE SARCINOID CHLOROKYBUS ATMOPHYTICUS (CHLOROPHYTA, CHAROPHYCEAE) REVEALED BY RAPID FREEZE FIXATION AND FREEZE SUBSTITUTION 1. Journal of Phycology 1988, 24, 237-248.
Lokhorst, G.M.; Star, W. PYRENOID ULTRASTRUCTURE IN ULOTHRIX (CHLOROPHYCEAE). Acta Botanica Neerlandica 1980, 29, 1-15, doi:https://doi.org/10.1111/j.1438-8677.1980.tb01184.x.
Lovlie, A.; Bråten, T. On mitosis in the multicellular alga Ulva mutabilis Føyn. J Cell Sci 1970, 6, 109-129, doi:10.1242/jcs.6.1.109.
Løvlie, A.; Bråten, T. On the division of cytoplasm and chloroplast in the multicellular green alga Ulva mutabilis føyn. Experimental Cell Research 1968, 51, 211-220, doi:https://doi.org/10.1016/0014-4827(68)90171-7.
Marchant, H.J. ULTRASTRUCTURE, DEVELOPMENT AND CYTOPLASMIC ROTATION OF SETA-BEARING CELLS OF COLEOCHAETE SCUTATA (CHLOROPHYCEAE)1. Journal of Phycology 1977, 13, 28-36, doi:https://doi.org/10.1111/j.1529-8817.1977.tb02882.x.
Marchant, H.J.; Pickett-Heaps, J.D. MITOSIS AND CYTOKINESIS IN COLEOCHAETE SCUTATA. Journal of Phycology 1973, 9, 461-471, doi:https://doi.org/10.1111/j.1529-8817.1973.tb04122.x.
Mattox, K.R.; Stewart, K.D. A COMPARATIVE STUDY OF CELL DIVISION IN TRICHOSARCINA POLYMORPHA AND PSEUDENDOCLONIUM BASILIENSE (CHLOROPHYCEAE)1. Journal of Phycology 1974, 10, 447-456, doi:https://doi.org/10.1111/j.1529-8817.1974.tb02738.x.
Mattox, K.R.; Stewart, K.D.; Floyd, G.L. The cytology and classification of Schizomeris leibleinii (Chlorophyceae). I. The vegetative thallus. Phycologia 1974, 13, 63-69, doi:10.2216/i0031-8884-13-1-63.1.
McArthur, D.M.; Moss, B.L. The ultrastructure of cell walls in Enteromorpha intestinalis (L.) link. British Phycological Journal 1977, 12, 359-368, doi:10.1080/00071617700650381.
McArthur, D.M.; Moss, B.L. Ultrastructural studies of vegetative cells, mitosis and cell division in Enteromorpha Intestinalis (L.) Link. British Phycological Journal 1978, 13, 255-267, doi:10.1080/00071617800650311.
McBride, G.E. Cytokinesis in the Green Alga Fritschiella. Nature 1967, 216, 939-939, doi:10.1038/216939a0.
Messyasz, B.; Czerwik-Marcinkowska, J.; Massalski, A.; Uher, B.; Rybak, A.; Szendzina, L.; Pikosz, M. Morphological and ultrastructural studies on Ulva flexuosa subsp. pilifera (Chlorophyta) from Poland. Acta Societatis Botanicorum Poloniae 2013, 82, 157-163, doi:10.5586/asbp.2013.013.
Messyasz, B.; Czerwik-Marcinkowska, J.; Uher, B.; Rybak, A.; Szendzina, L.; Pikosz, M. Ulva flexuosa subsp. pilifera (Chlorophyta, Ulvophyceae) from the Wielkopolska region (West Poland): a new observation on the ultrastructure of vegetative cells. Oceanological and Hydrobiological Studies 2013, 42, 209-215, doi:10.2478/s13545-013-0077-8.
Michetti, K. A light and electron microscopic study on the formation, structure and germination of akinetes of Stigeoclonium tenue (Chaetophorales, Chlorophyceae). 2002.
Michetti, K.M.; Leonardi, P.I.; Cáceres, E.J. Morphology, cytology and taxonomic remarks of four species of Stigeoclonium (Chaetophorales, Chlorophyceae) from Argentina. Phycological Research 2010, 58, 35-43, doi:https://doi.org/10.1111/j.1440-1835.2009.00556.x.
Michetti, K.M.; Leonardi, P.I.; CÁCeres, E.J. PRECISIONES SOBRE LA MORFOLOGÍA Y ULTRAESTRUCTURA DEL TALO DE CHAETOPHORA ELEGANS (CHAETOPHORALES, CHLOROPHYTA). Darwiniana 2003, 41, 37-41.
Mikhailyuk, T.; Holzinger, A.; Massalski, A.; Karsten, U. Morphology and ultrastructure of Interfilum and Klebsormidium (Klebsormidiales, Streptophyta) with special reference to cell division and thallus formation. Eur J Phycol 2014, 49, 395-412, doi:10.1080/09670262.2014.949308.
Mikhailyuk, T.I.; Sluiman, H.J.; Massalski, A.; Mudimu, O.; Demchenko, E.M.; Kondratyuk, S.Y.; Friedl, T. NEW STREPTOPHYTE GREEN ALGAE FROM TERRESTRIAL HABITATS AND AN ASSESSMENT OF THE GENUS INTERFILUM (KLEBSORMIDIOPHYCEAE, STREPTOPHYTA)1. Journal of Phycology 2008, 44, 1586-1603, doi:https://doi.org/10.1111/j.1529-8817.2008.00606.x.
Molnar, K.E.; Stewart, K.D.; Mattox, K.R. CELL DIVISION IN THE FILAMENTOUS PLEURASTRUM AND ITS COMPARISON WITH THE UNICELLULAR PLATYMONAS (CHLOROPHYCEAE)1. Journal of Phycology 1975, 11, 287-296, doi:https://doi.org/10.1111/j.1529-8817.1975.tb02781.x.
Permann, C.; Herburger, K.; Niedermeier, M.; Felhofer, M.; Gierlinger, N.; Holzinger, A. Cell wall characteristics during sexual reproduction of Mougeotia sp. (Zygnematophyceae) revealed by electron microscopy, glycan microarrays and RAMAN spectroscopy. Protoplasma 2021, 258, 1261-1275, doi:10.1007/s00709-021-01659-5.
PICKETT-HEAPS, I. CELL DIVISION AND WALL STRUCTURE IN MICROSPORA. New Phytologist 1973, 72, 347-355, doi:https://doi.org/10.1111/j.1469-8137.1973.tb02042.x.
Pickett-Heaps, J. Reproduction by zoospores inOedogonium. Protoplasma 1971, 72, 275-314, doi:10.1007/BF01279055.
Pickett-Heaps, J. Ultrastructure and differentiation in Chara (fibrosa) IV. Spermatogenesis. Australian Journal of Biological Sciences 1968, 21, 655-690.
Pickett-Heaps, J. Ultrastructure and differentiation in Chara sp. I. Vegetative cells. Australian Journal of Biological Sciences 1967, 20, 539-552.
Pickett-Heaps, J. Ultrastructure and differentiation in Chara sp. II. Mitosis. Australian Journal of Biological Sciences 1967, 20, 883-894.
Pickett-Heaps, J.; Fowke, L. Cell Division in Oedogonium I. Mitosis, Cytokinesis, and Cell Elongation I. Mitosis, Cytokinesis, and Cell Elongation. Australian Journal of Biological Sciences 1969, 22, 857-894, doi:https://doi.org/10.1071/BI9690857.
Pickett-Heaps, J.D. CELL DIVISION IN BULBOCHAETE. I. DIVISIONS UTILIZING THE WALL RING1. Journal of Phycology 1973, 9, 408-420, doi:https://doi.org/10.1111/j.1529-8817.1973.tb04114.x.
Pickett-Heaps, J.D. Cell division in Stichococcus. British Phycological Journal 1974, 9, 63-73, doi:10.1080/00071617400650081.
Pickett-Heaps, J.D. Some Ultrastructural Features of Volvox, with Particular Reference to the Phenomenon of Inversion. Planta 1970, 90, 174-190.
Pickett-Heaps, J.D.; McDonald, K.L. Cylindrocapsa: Cell Division and Phylogenetic Affinities. The New Phytologist 1975, 74, 235-241.
Pickett-Heaps, J.D.; Wetherbee, R. Spindle function in the green alga Mougeotia: Absence of anaphase A correlates with postmitotic nuclear migration. Cell Motility 1987, 7, 68-77, doi:https://doi.org/10.1002/cm.970070109.
Retallack, B.; Butler, R.D. Reproduction in Bulbochaete hiloensis (Nordst.) Tiffany. Archiv für Mikrobiologie 1973, 90, 343-364, doi:10.1007/BF00408929.
Retallack, B.; Butler, R.D. The development and structure of the zoospore vesicle in Bulbochaete hiloensis. Archiv für Mikrobiologie 1970, 72, 223-237, doi:10.1007/BF00412174.
Rindi, F.; Guiry, M.D.; Lopez-bautista, J.M. New records of Trentepohliales (Ulvophyceae, Chlorophyta) from Africa. Nova Hedwigia 2006, 83, 431-449.
Rindi, F.; Lam, D.W.; López-Bautista, J.M. Trentepohliales (Ulvophyceae, Chlorophyta) from Panama. Nova Hedwigia 2008, 87, 421-444, doi:10.1127/0029-5035/2008/0087-0421.
Rindi, F.; Lopez-bautista, J.M. Diversity and ecology of Trentepohliales (Ulvophyceae, Chlorophyta) in French Guiana. Cryptogamie Algologie 2008, 29, 13-43.
Rindi, F.; López-Bautista, J.M. New and interesting records of Trentepohlia (Trentepohliales, Chlorophyta) from French Guiana, including the description of two new species. Phycologia 2007, 46, 698-708, doi:10.2216/06-88.1.
Rindi, F.; Sherwood, A.R.; Guiry, M.D. Taxonomy and distribution of Trentepohlia and Printzina (Trentepohliales, Chlorophyta) in the Hawaiian Islands. Phycologia 2005, 44, 270-284, doi:10.2216/0031-8884(2005)44[270:TADOTA]2.0.CO;2.
Sanchez Puerta, M.V.; Leonardi, P.I.; Cceres, E.J.; O'Kelly, C.J. 141 New Entities in the Order Chaetopeltidales. Journal of Phycology 2003, 39, 49-49, doi:https://doi.org/10.1111/j.0022-3646.2003.03906001_141.x.
Sanchez-Puerta, M.V.; Leonardi, P.I.; O'Kelly, C.J.; Cáceres, E.J. PSEUDULVELLA AMERICANA BELONGS TO THE ORDER CHAETOPELTIDALES (CLASS CHLOROPHYCEAE), EVIDENCE FROM ULTRASTRUCTURE AND SSU RDNA SEQUENCE DATA1. Journal of Phycology 2006, 42, 943-950, doi:https://doi.org/10.1111/j.1529-8817.2006.00245.x.
Sears, J.R.; Brawley, S.H. Smithsoniella gen. nov., a Possible Evolutionary Link between the Multicellular and Siphonous Habits in the Ulvophyceae, Chlorophyta. American Journal of Botany 1982, 69, 1450-1461, doi:10.2307/2443106.
Segaar, P.J.; Lokhorst, G.M. Cell division in the green alga Ulothrix palusalsa (Ulvophyceae, Chlorophyta): A combined immunofluorescence and transmission electron microscopy study. Phycologia 1987, 26, 100-110, doi:10.2216/i0031-8884-26-1-100.1.
Segaar, P.J.; Lokhorst, G.M. Dynamics of the microtubular cytoskeleton in the green algaAphanochaete magna (Chlorophyta). I. Late mitotic stages and the origin and development of the phycoplast. Protoplasma 1988, 142, 176-187, doi:10.1007/BF01290874.
Sluiman, H.J. A pathway of plasma membrane biogenesis bypassing the Golgi apparatus during cell division in the green alga Cylindrocapsa geminella. Journal of cell science 1984, 72, 89-100.
Sluiman, H.J.; Roberts, K.R.; Stewart, K.D.; Mattox, K.R. COMPARATIVE CYTOLOGY AND TAXONOMY OF THE ULVOPHYCEAE. IV. MITOSIS AND CYTOKINESIS IN ULOTHRIX (CHLOROPHYTA). Acta Botanica Neerlandica 1983, 32, 257-269, doi:https://doi.org/10.1111/j.1438-8677.1983.tb01711.x.
Spanswick, R.M.; Costerton, J.W.F. Plasmodesmata in Nitella translucens: Structure and electrical resistance. Journal of Cell Science 1967, 2, 451-464, doi:10.1242/jcs.2.3.451.
Stewart, K.D.; Mattox, K.R.; Floyd, G.L. MITOSIS, CYTOKINESIS, THE DISTRIBUTION OF PLASMODESMATA, AND OTHER CYTOLOGICAL CHARACTERISTICS IN THE ULOTRICHALES, ULVALES, AND CHAETOPHORALES: PHYLOGENETIC AND TAXONOMIC CONSIDERATIONS1. Journal of Phycology 1973, 9, 128-141, doi:https://doi.org/10.1111/j.1529-8817.1973.tb04068.x.
Watanabe, S.; Fučíková, K.; Lewis, L.A.; Lewis, P.O. Hiding in plain sight: Koshicola spirodelophila gen. et sp. nov. (Chaetopeltidales, Chlorophyceae), a novel green alga associated with the aquatic angiosperm Spirodela polyrhiza. American Journal of Botany 2016, 103, 865-875, doi:https://doi.org/10.3732/ajb.1500481.
